# Supplementary material for: The Survival and Physiological Response of Calliptamus abbreviatus Ikonn (Orthoptera: Acrididae) to Flavonoids Rutin and Quercetin
Source: MDPI journal article supplement (doi:10.3390/insects15020095), 2024-02-01
Supplement: s1 [file s1]

# The survival and physiological response of *Calliptamus abbreviatus* Ikonn (Orthoptera: Acrididae) to flavonoid rutin and quercetin

Xunbing Huang<sup>1</sup>, Li Zheng<sup>1,2</sup>, Yuyue Wang<sup>1</sup>,

<sup>1</sup> College of Agriculture and Forestry Science, Linyi University, Linyi 276000, P.R. China;

<sup>2</sup> Key Laboratory of Natural Enemies Insects, Ministry of Agriculture and Rural Affairs, Jinan 250100, China

Corresponding author, e-mail: xunbingh@163.com; zhengli64@126.com

**Table S1 Designed sequences of gene primers for real time PCR**

| Gene description               | Sequence of primers (5' to 3') |                        |
|--------------------------------|--------------------------------|------------------------|
| $\beta$ -glucosidase           | Forward                        | TCGGAAGTGGCTGCATCGATG  |
|                                | Reverse                        | CCTCGTACCAGCAGCTGAGC   |
| UDP-glucuronosyltransferase 2B | Forward                        | CGTGATAGGAAGCCTCGTT    |
|                                | Reverse                        | TGTGGAAGTGGGAGAAGGA    |
| cytochrome P450s 6k            | Forward                        | ACAAGGAAGATGGCAGGA     |
|                                | Reverse                        | GGGCTCTACTCAATACTCCG   |
| superoxide dismutase           | Forward                        | ATTCTCAGTCCAGACACGG    |
|                                | Reverse                        | TCTCAGGGTAATGATGGTATCC |
| peroxidase                     | Forward                        | CCTGAGTGGTGTCTACGTGA   |
|                                | Reverse                        | GCAGCGACGCAGCTCATCGG   |
| catalase                       | Forward                        | GGACTAGGGACGTTAGGCTA   |
|                                | Reverse                        | TAGACGTGAGGAGGGCGTGG   |
| $\beta$ -actin                 | Forward                        | CGTCATCTTCTCACGGTTG    |
|                                | Reverse                        | TCTGGCACCACACCTTCTAC   |
